# Supplementary material for: A Computational Framework for High-Throughput Isotopic Natural Abundance Correction of Omics-Level Ultra-High Resolution FT-MS Datasets
Source: MDPI journal article supplement (doi:10.3390/metabo3040853), 2013-09-25
Supplement: s1 [file s1]

## Supplemental Materials

Equation (1)

$$I_{M+i,j,h} = \frac{I_{M+i,j,h;NA} - \sum_{x=0;y=0;z=0}^{x \leq i; y \leq j; z \leq h} I_{M+x,y,z} * P_C(x,i) * P_N(y,j) * P_H(z,h)}{(1 - S_C(i))(1 - S_N(j))(1 - S_H(h))}$$

Equation (2)

$$P_C(n,k) = \binom{C_{Max} - n}{k - n} (NA_{13C})^{k-n} (1 - NA_{13C})^{C_{Max}-k}$$

Equation (3)

$$S_C(n) = \sum_{k=n+1}^{C_{Max}} P_C(n,k)$$
